# Supplementary material
Source: PubMed Central journal article supplement (PMC4583712)

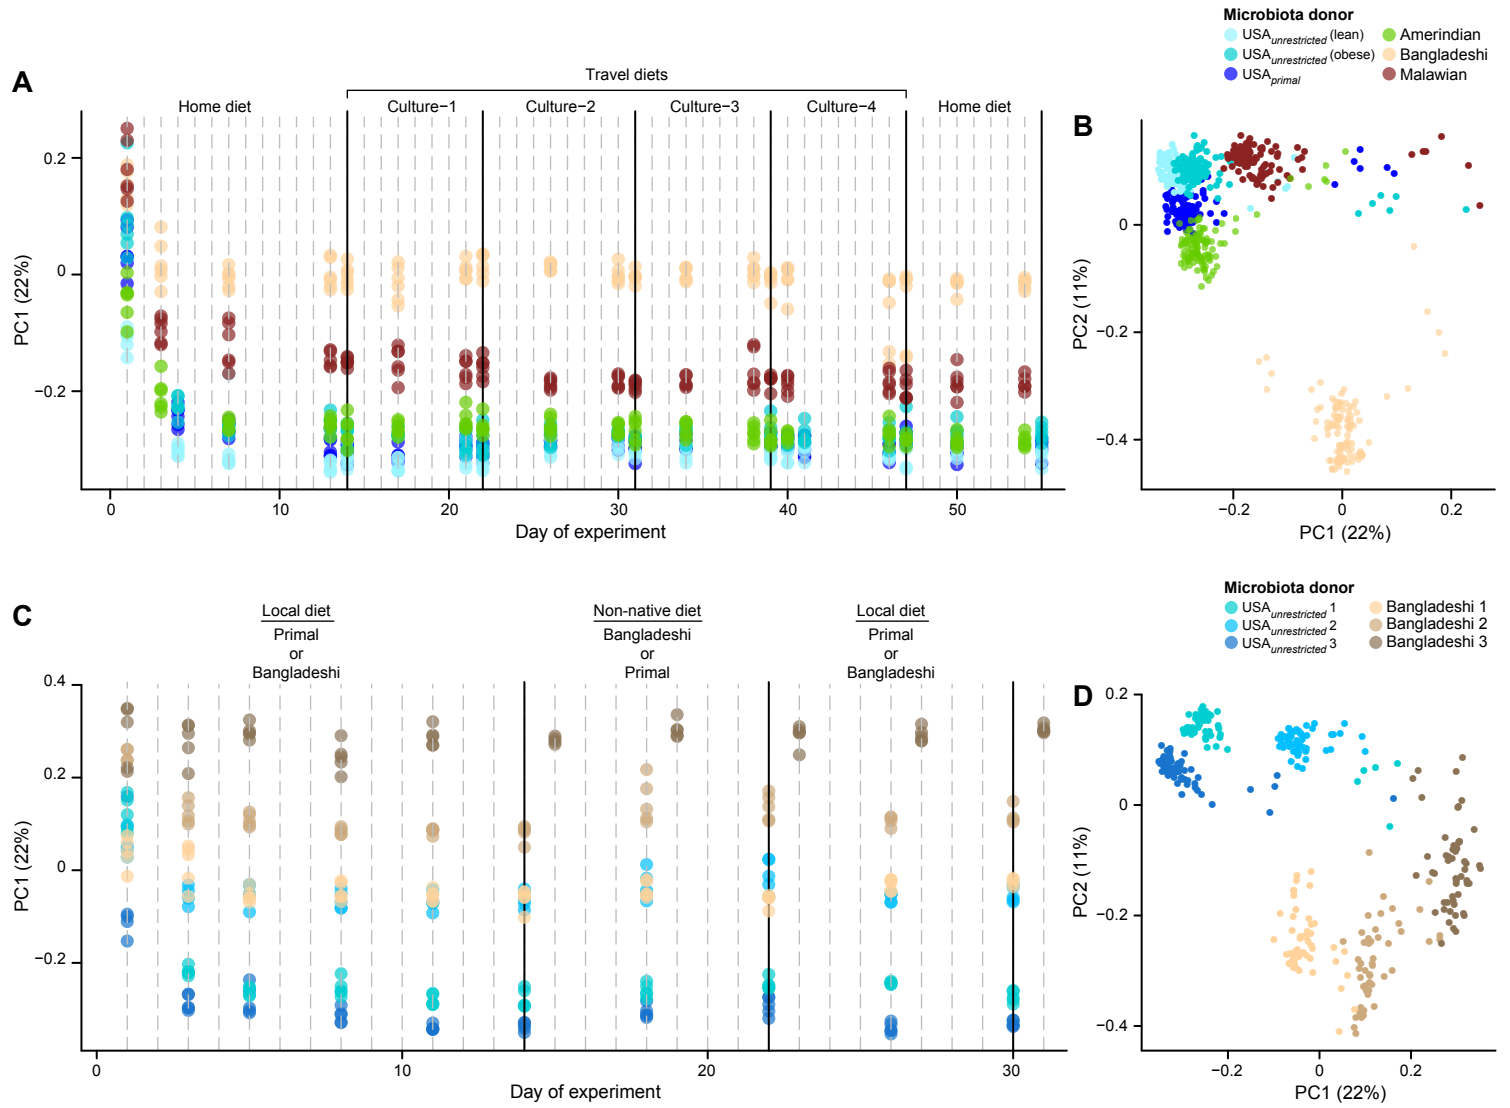

Supplement: NIHMS719807-supplement-2.pdf [file NIHMS719807-supplement-2.pdf]
